# Supplementary figures and images for: Ecological assessment and development of analytical methods for concurrent quantification of valsartan and sacubitril: whiteness comparative study based on relative scoring
Source: Royal Society of Chemistry journal article supplement (doi:10.1039/d4ra01997k), 2024-01-01

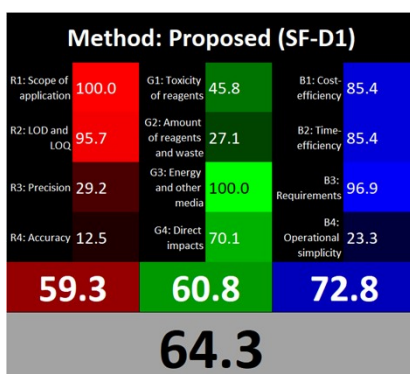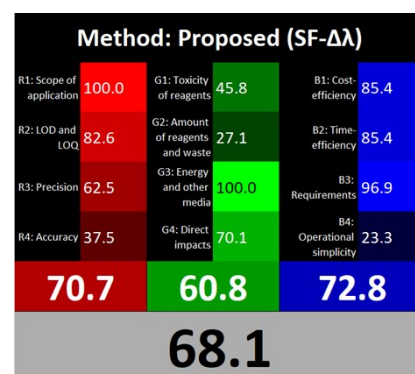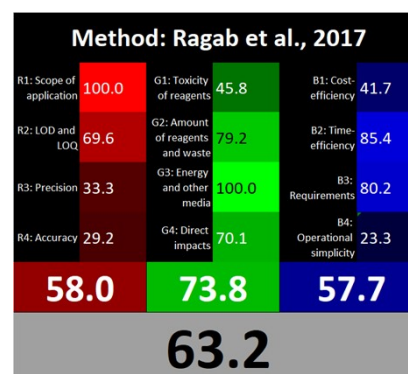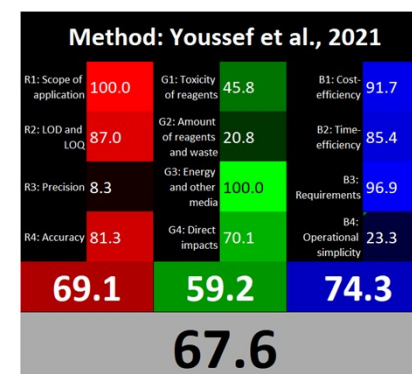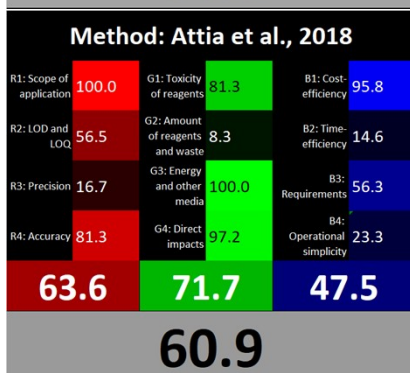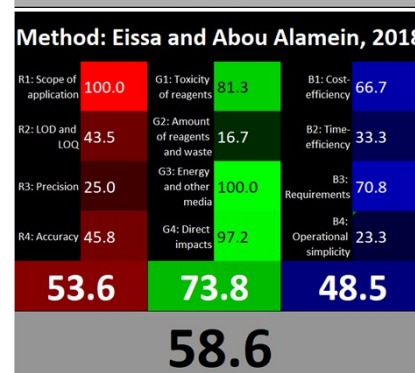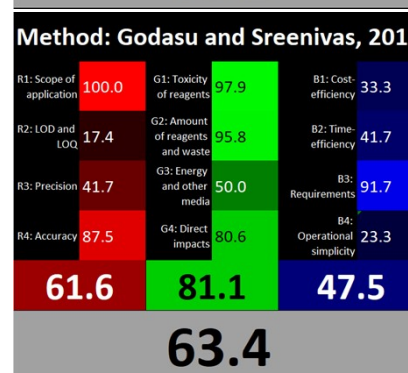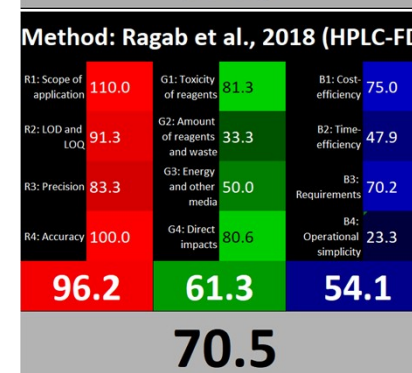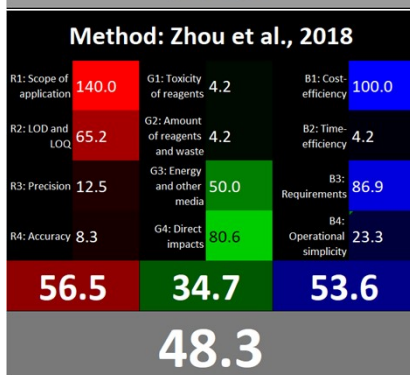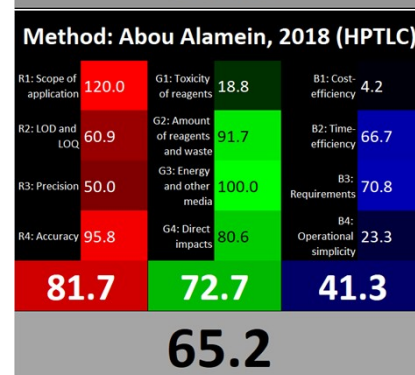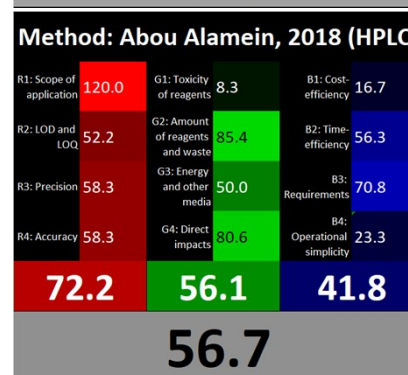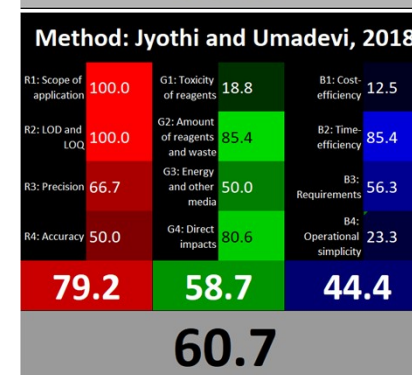

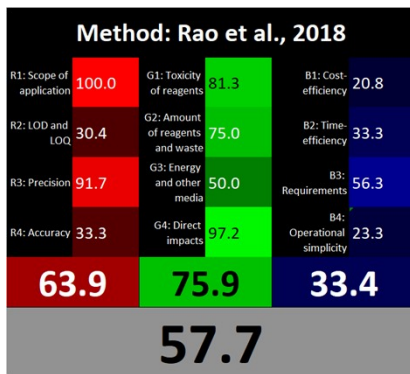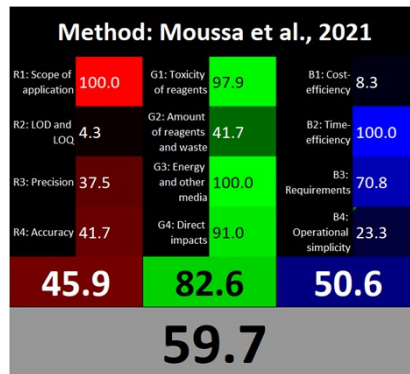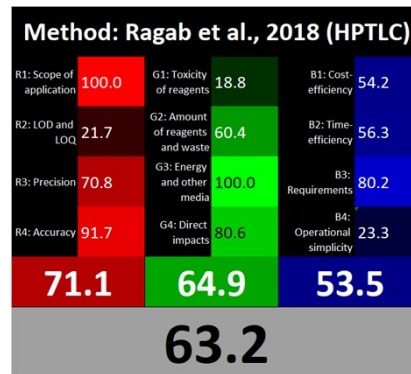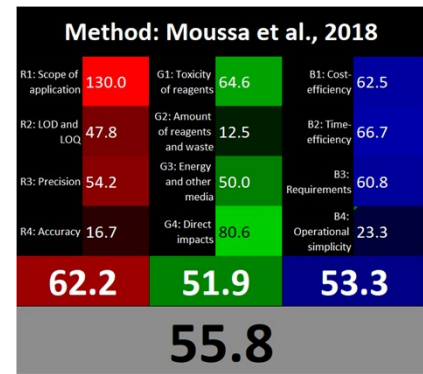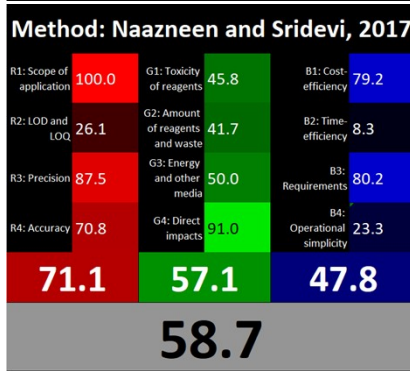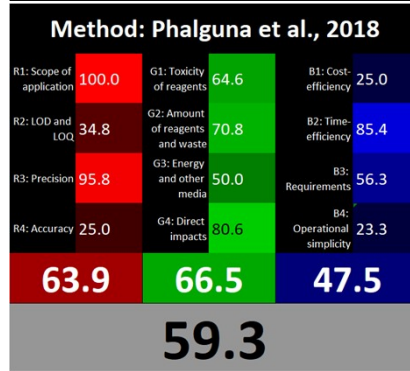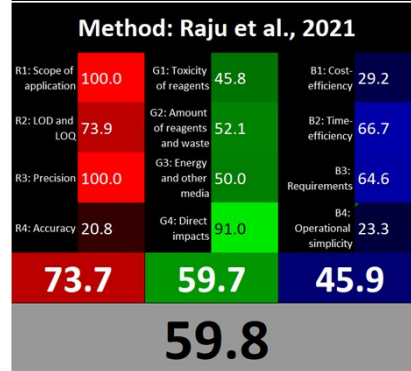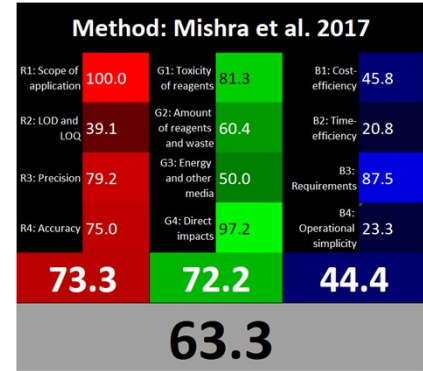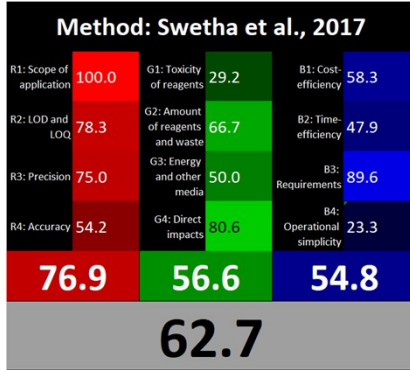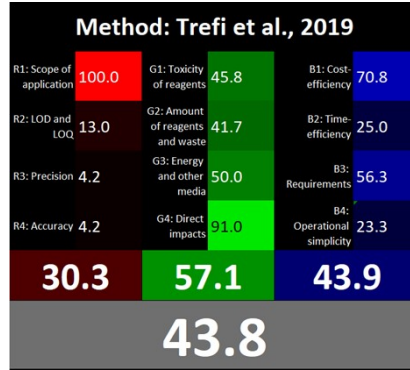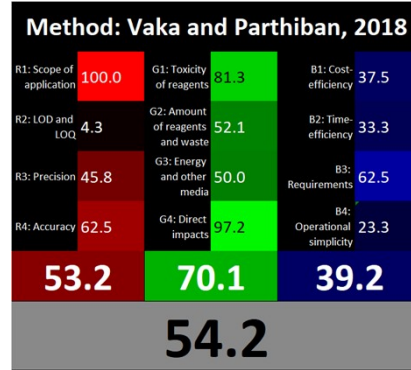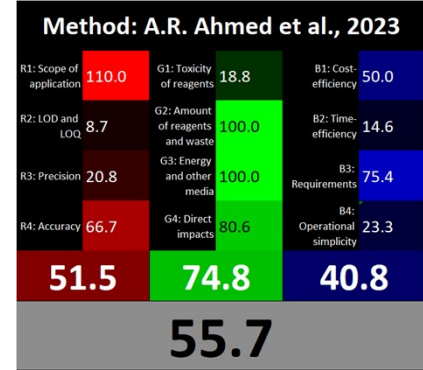

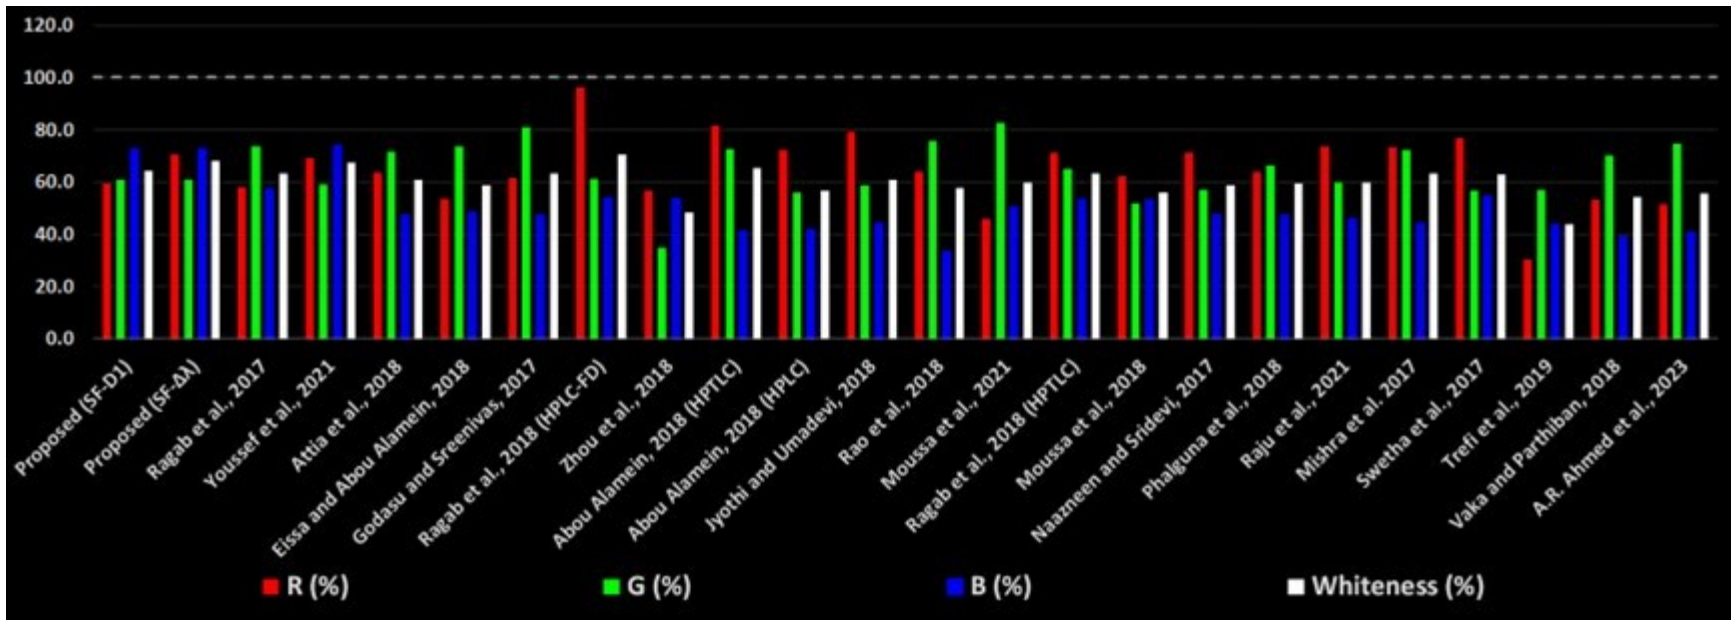

ESI. Fig. 1: Whiteness comparative evaluation for the studied methods

Supplement: d4ra01997k1.pdf [file d4ra01997k1.pdf]
